# Supplementary material for: Using Arctic ice mass balance buoys for evaluation of modelled ice energy fluxes
Source: Copernicus journal article supplement (doi:10.5194/gmd-2019-113), 2019-08-19
Supplement: Supplementary file [file gmd-2019-113-AC1-supplement.pdf]

## **Authors' response to reviews of 'Using Arctic ice mass balance buoys for evaluation of modelled 1 ice energy fluxes'**

We thank the reviewers for their detailed, considered analysis of our manuscript. Our response is in three sections:

1. Response to reviewer 1
2. Response to reviewer 2
3. Summary of proposed changes and additions to manuscript arising from the reviews

### **1. Reply to reviewer 1**

Original reviewer comments are shown in italic font, our response in normal font.

**General comments:** *The authors present a thorough analysis of the well known dataset of ice mass buoys deployed covering the Central Arctic and Beaufort Gyre regions since 1993 to provide climatology seasonal estimates of the top and bottom ice conductive and melt and ocean fluxes over and under sea ice. The novelty of the method lies in the fine analysis of the data and in the physical processing applied to retrieve meaningful fluxes that can then be used to evaluate climate models such as the HadGEM2-ES Met Office model. I am supportive of this paper being accepted in this general as this dataset and methodology offers a useful tool to the modelling but also remote sensing and in-situ communities. Nevertheless one of the main strength of this paper is the (clean) dataset produced as well as the algorithm developed to analyse these dataset and I strongly encourage the authors to make these data available to the community. In addition, in this case, the nature of the product calls for more transparency and sharing the code and data will warrant easier reproducibility for the scientific community. Finally, a significant effort is needed to clarify the sensitivity of the analysis to the various constants and approximations made. I provide some detailed comments below on how this could be achieved.*

We thank the reviewer for their kind remarks. Although it was not possible to publish the code in time for the publication of the discussion paper, due to internal procedures, we strongly agree that the code should be published, and intend to publish a version with the next revision of the paper (providing one is requested), as long as the internal review process can be completed in time.

The reviewer's suggestion that, in addition, a version of the processed data should be made available to the community is constructive and helpful. After reading this, we have begun an overhaul of the code in order to enable the production of the processed IMB data in netCDF format, and hope to be able to publish this simultaneously.

### **Specific comments:**

#### **Abstract**

#### **Introduction**

P1L23: add reference to Kwok, 2018

This will be added.

#### **Calculating monthly-mean energy fluxes from the IMBs**

P3L26: would a more advanced optimal interpolation scheme improve the results?

Yes, probably – such a scheme could make use of information about other variables, for example. However we decided early on to use a very simple scheme for the present study to ease the processing of data. The results of the estimation scheme used were, individually, sensible. The estimation scheme is contained in a single function in the code, which could easily be replaced by a more advanced scheme in a future study.

*P3L33: define z\_srf and explain a little more (maybe in appendix or with figure 4) how z\_srf and z\_int are sufficient to estimate both changes of surface and bottom sea ice.*

The point to explain is how z\_sfc is sufficient to estimate changes in the snow-ice interface elevation (not in the surface – which z\_sfc represents – or in the ice base). However, clearly this point is not explained very clearly. z\_sfc will be defined and we will try to improve the clarity of this paragraph.

*P4L2: King et al, 2018 and Mercouriadi et al, 2018 have shown that such snow ice formation is prevalent in some regions of the Arctic. Discuss.*

We note that tracks of floes analysed for the N-ICE2015 expedition, on which significant snow-ice formation is observed (as described by the references you cite), cross the far south-east of our North Pole region, in several cases intersecting IMB tracks. This apparent contradiction needs resolving.

Our explanation of why we do not believe snow-ice formation is prevalent in the IMB dataset requires further elaboration. For most months of the IMB dataset, the ice is sufficiently thick, and the snow sufficiently thin, that snow-ice formation can be judged unlikely from hydrostatic principles. In addition, during the winter, at randomly inspected times and buoys when the surface temperature is sufficiently cold, the change in temperature gradient associated with the change in conductivity between ice and snow is roughly co-located with the snow-ice interface (as measured by the IMBs, or estimated by our method). ‘Roughly’ meaning to within about 10cm.

There are isolated instances (4 by our count) where snow-ice formation is possible, but these are often associated with sensor failure. For example, the buoy 2015D sees steep rises in snow depth in November 2015 that would, if genuine, almost certainly be associated with snow-ice formation; but as all other elevation series begin reporting missing data at the same time, and many of the thermistors in the ice layer appear to stop working, no data from this buoy reaches the final dataset in any case. This issue could suggest that snow-ice formation had the potential to corrupt the IMB sensors, and that therefore it is significantly undersampled by the IMBs.

We will add a more detailed discussion of the snow-ice formation issue, along the lines of the paragraphs above.

*P4L13: couldn't you ask the data providers?*

This would be a sensible way to proceed; we have contacted them, and hope that this will enable a more definitive answer to this question.

*P4L19: a link to the code would be very valuable here.*

The code will be provided with the revised version of the document.

*P4L26: you can cite Alexandrov et al, 2010 for values of snow and ice density. Snow evolves throughout the season with values typically from ~200 to 350 (i.e. Tilling et al, 2017)*

We will cite the paper the reviewer suggests. Reviewer 2 suggested that it would be a useful exercise to judge the sensitivity of the fluxes to assumptions about snow density.

*P4L34: not clear where this formula comes from and if it applies to the real snow on sea ice. At what depth?*

This refers to another paragraph that was clearly not very well written; perhaps a new figure would help clarify the meaning here. Conductive fluxes are determined by taking linear fits through the temperature profile: near the snow-ice interface the temperature profile 'turns a corner', rendering a linear fit useless. The point of the formula is to 'straighten' the temperature profile by rotating the part of the profile above the interface. In other words, we calculate what the temperature of the snow layer would be if it was ice instead, and the conductive flux profile remained the same. Given this intent, the formula is just basic geometry: the issue as regards physical realism is with the underlying assumptions about conductivity, rather than the formula itself.

*P5L9: this fixed thickness (say  $L$ ) is a parameter of your analysis. Discuss how sensitive your results are to this choice.*

This would be a valuable addition to the analysis and we will include this in the revised version.

*P5L29: similarly how does the uncertainty on these constants impact your results? Discuss.*

We agree that the uncertainty analysis would be improved by consideration in uncertainty in the thermodynamic parameters of sea ice. However, our view is that not all of the parameters are equal in this respect. The ratio between ice salinity and melting temperature is a very well-constrained parameter and is unlikely to contribute to the uncertainty in any meaningful way. By contrast, the rate of dependence of conductivity on salinity (denoted by  $\beta$  in our paper) is subject to considerable uncertainty which would bear investigation. For example, it would be interesting to see how our flux estimates vary when the alternative formulation of Pringle et al (2009) is used.

The salinity, heat capacity and specific heat of fusion of fresh ice are also constants that would bear investigation in this regard. However, we think that it is likely that uncertainty in salinity would still dominate the uncertainty in the IMB-derived fluxes, particularly if we use expanded salinity ranges, as discussed below.

*P6L1: These values come from where? Recent work Nandan et al 2018 show salinity at the snow ice interface to be larger than 1. There are more references but Turner et al 2015 (model work on CICE) but also Notz etc...*

We thank the reviewer for providing these references. Our view is that the subject of sea ice salinity is sufficiently complex that the only way of properly accounting for this in the present study, without seriously detracting from its main purpose, is to use uncertainty ranges that encompass all realistic salinity values. We will use expanded uncertainty ranges in the next paper revision, allowing values up to 10 at both the top and lower surfaces of the ice.

*P6L5: equation is no readable*

This will be corrected.

*P6L17-21 where is that shown. Perform proper sensitivity analysis to all these parameters in your plots, discussion etc...*

The reviewer has correctly identified that there are indeed additional sources of uncertainty not accounted for here, and we will endeavour to incorporate these into our estimates.

*P7L1: interesting. How would you inform the  $S$  value. Is it measured? Explain. What problem are you referring to here.*

Salinity is not measured, but the temperature and elevation data act to constrain the salinity ranges. For example, if the ice surface is at -0.1m, and the temperature at -0.2m is -0.1 deg C, this implies the melting temperature of the ice at -0.2m is greater than -0.1 deg C. Hence the salinity is lower than 1.9. The 'problem' as described in this paragraph is that occasionally the temperatures are in this way inconsistent with the assumed salinity ranges.

*P7L5: Tsamados et al, 2015 has implemented the three equation boundary conditions and discussed false bottom impact on sea ice - ocean bottom fluxes*

We will add a reference to their analysis. Instead of our stating that false bottom formation renders the computation of ocean heat flux impossible, it is probably more accurate to say that it greatly complicates its calculation – and given the number of data points affected, may be outside the scope of this study.

*P7L13: Interesting. Can you see synoptic signal related to snow forcing (i.e. storms?). At what timescale are you solving these? Monthly? Should you pre-process such erroneous signals before monthly averaging? Explain -> share code!*

At the moment we are processing these at monthly timescale. We agree that it would be preferable to process these before monthly averaging, and will try to improve on this in our next revision as part of our code overhaul.

*P3L28: Some have argued that power law is in the forcing? How sensitive are your re-sults to the spatio-temporal lenghtscales of the atmo/ocean forcing? P4L8: we branch-> meaning? P4L13: justify this choice. Cite Landy et al, 2019 P4L19: bold not a goodidea. i suggest run\_ITD run\_noITD3*

We assume that this paragraph is included in error as it does not obviously correspond to text in the paper (and the chronology is different).

### ***Deriving monthly-mean flux distributions from the IMBs***

*P7L27: why not two regions in the table*

We did not want to include too much information in a single table, to improve ease of reading. Additional tables could be provided, giving the flux distributions by region.

*P7L28: why don't you discuss changes between decades I.e. 90s vs 00s vs 10s?*

Only 7 buoys are available for the 1990s; 6 of these were from the SHEBA campaign (i.e. in the same year, 1997-1998, at the same location in the Beaufort Sea), and the remaining buoy, deployed in 1993, was also located in the Beaufort Sea. Hence there is probably not enough data from this decade to properly sample spatial or interannual variability in the Beaufort Sea region, and none at all in the North Pole region.

After the year 2000, and particularly after the year 2007, buoy numbers increase substantially. There may be scope to carry out some limited analysis of interannual variability by comparing, for example, the period 1993-2006 to 2007-2015, particularly if data from different months and regions can be aggregated. However the periods will need to be chosen with care to ensure adequate sampling. We will see if there is some way to do this in the revised manuscript.

*P9L1: explain a bit more how these errors on the individual monthly scatter points are obtained. Are you performing an error propagation or are these simply a standard deviation?*

The errors on the individual monthly scatter points are obtained by propagating the salinity uncertainties assumed in Section 2 (1 +/- 1 at ice top and 4 +/- 4 at ice base) and the measurement uncertainties described by Perovich and Richter-Menge (2006). These should not be

confused with the intervals given in e.g. page 9 line 1, which describes the standard deviation of the full distribution of central estimates of monthly mean fluxes.

#### **4 Evaluating modelled sea ice using the. IMB-derived fluxes**

*P9L21: not clear if you estimate the fluxes at the same location in time and space as the IMBs or average over the whole region for the whole month. You should both to test impact of IMB sampling on your results.*

We average over the whole region. Model internal variability is such that we do not expect the model to exactly capture the conditions at each point in space and time, and therefore did not see any particular value in sampling the model only at identical points to the IMBs. As discussed in the appendix, we suspect that the largest impact of IMB sampling is through the ice thickness – this would not be solved by evaluating the model at the same points in space and time, as we would still be evaluating fluxes over the entire grid cell. It is not clear to us, therefore, that the impact of IMB sampling would be revealed by the methods that the reviewer suggests.

*P9L27: why didn't you perform your analysis on a more advanced model with more Ice thickness categories?*

We chose to evaluate HadGEM2-ES because its sea ice simulation was already fairly well-understood. Confidence in the IMB-based evaluation could therefore be informed by how consistent this was with the sea ice and surface radiation evaluation. We are now evaluating the new UK CMIP6 models (HadGEM3-GC3.1 and UKESM1.0) in the same way, but this evaluation appears to be outside the scope of this study, which is intended only to demonstrate the new method. Note that although the new models are more advanced (multilayer thermodynamics and explicit meltponds), the number of thickness categories is the same.

*P9L35: is it West2018 or 2019.*

2019. This will be corrected.

*P10L4: again not clear if you perform comparison like for line (i.e. for same days and grid cells) or not.*

No – the model distribution is calculated over the whole region, for reasons described above. Model internal variability means that we do not expect fluxes at the exact same pathways, at the same times, to better represent the conditions than the fluxes over the whole region and time period.

*P10: here you list various fluxes but don't explain why you find these results. A bit too descriptive.*

The intention here was to separate the evaluation (section 4.1) with the discussion of reasons for the results (section 4.2). Some discussion could instead be added to section 4.1 if this helps readability.

*P11L5: West 2018 or 2019?*

2019 – again this will be corrected.

*P11: discuss role of melt ponds (summer) and snow cover (winter)*

The role of snow cover in winter in the conductive flux biases can be investigated directly by comparing IMB-measured snow depths to those modelled by HadGEM2-ES. Indeed, there may be scope to carry out such a comparison alongside a comparison of conductive flux and ice thickness which was requested by Reviewer 2 (see below).

The role of melt ponds in summer in the top melt biases (which is what we assume the reviewer means) would be more difficult to evaluate directly. In HadGEM2-ES, meltponds are parameterised from surface temperature (and can therefore be diagnosed from this variable). In the IMBs however, surface temperature is probably a highly imperfect proxy for meltpond coverage (and hence surface albedo). In theory, meltpond occurrence could be detected

*P12: I think a lot of your analysis is missing the link to melt pond coverage*

## 2. Reply to reviewer 2

*The authors use ice mass balance buoys (IMB) to estimate fluxes through the top and bottom of sea ice. The authors present this new method and then compare the observed fluxes in the North Pole and Beaufort Sea regions. The authors then compare the observed fluxes with modeled fluxes from the HadGEM2-ES climate model. The main findings are that there are biases in these fluxes in the model, which are likely due to the biased mean state of the model. Additionally, there are differences in the fluxes in the Beaufort Sea and North Pole regions. I have a few minor and moderate concerns about the way the model and observations are compared and these need to be addressed before I can recommend publication.*

### **Major concerns**

#### *1) Internal Climate Variability*

*The elephant in the room for a comparison between a climate model and observational data is the issue of internal climate variability (see references below), which you never mention, and leads me to have major concerns with your method. This is also relevant for when the Arctic will become ice free, which you mention in the introduction. Since HadGEM2-ES is a fully-coupled, freely-evolving climate model a single model experiment should not be expected to match the observed sea ice conditions. You do not mention using ensembles and where/how the observations fit in an ensemble spread.*

In the analysis shown in this paper, we use only the first historical ensemble member of HadGEM2-ES. We can revise the analysis to include the full ensemble (albeit only 4 members) to estimate the internal variability in the fluxes, and compare these to the model biases.

However, it's important to note that the main purpose of the study is to demonstrate the value of the IMB-based evaluation, rather than to draw conclusions from the model biases demonstrated. To demonstrate the value of the evaluation method, it is in our view sufficient that a) the IMB-measured model biases are consistent with biases in the sea ice and surface radiation simulations, and b) they are larger in many months than the observational uncertainty in the IMB fluxes. Whether or not the biases result from internal variability, or another cause, is in our view of only secondary importance for this study. This would not be the case if we were trying to draw conclusions from the model biases, in which case the internal variability context would be vital (hence the many studies of internal variability in sea ice extent trends, some of which the reviewer quotes).

*Indeed, it appears you are comparing the mean climate model state with the mean observations (Fig. 8). This is not a particularly useful comparison – we know the model is biased from your previous work and therefore we expect to see biases in these mean fluxes as a result!*

But we would argue that to find biases in the mean fluxes that are physically consistent with biases in the sea ice simulation is in itself a significant result – because we are demonstrating an entirely new method of model evaluation. We will state this more explicitly.

*Instead, a more useful analysis would be to evaluate situations when the model does have similar thicknesses to those observed, do the fluxes match the observations? That would tell us more about the processes going on in the model and how well they compare to those observed. You could do this by plotting the distribution of the conductive fluxes by thickness for the model and observations for a particular month or throughout the year.*

A comparison of conductive fluxes to ice thickness, for both the model and IMBs, would be an informative addition to the paper and we will incorporate this into a revision, possibly in a new subsection to section 4. However, there is an issue to be aware of.

A scatter plot of monthly mean IMB conductive fluxes and ice thicknesses against monthly gridbox mean conductive fluxes and ice thickness is still not a like-for-like comparison. This is mainly due

to the sea ice thickness distribution of HadGEM2-ES. A cell with mean thickness-over-ice of 3m, for example, could include 10% ice at 0.5m thick, 60% ice at 3m and 30% ice at 3.9m. This matters, of course, because the relationship between ice thickness and conductive flux is nonlinear. Average conductive flux in such a grid cell would be much higher than that in a single IMB-observed ice column of thickness 3m under identical atmospheric conditions, because the small amount of ice of thickness 0.5m would transfer much more energy to the atmosphere.

To solve this problem, and obtain a like-for-like comparison, the modelled flux needs to be plotted against the area-weighted harmonic mean thickness over ice, rather than the arithmetic mean. Because of the need to explain the issue, and justify the solution, the new subsection will not be brief.

*Two additional comments on the model: a) It would be useful to quantify other relevant model biases to the sea ice mass budget like SST or ocean heat transport.*

Ocean heat transport can be quantified. Over the Arctic Ocean as a whole it is about  $4 \text{ Wm}^{-2}$ , roughly consistent with observational estimates to first order. We can also quantify it seasonally over the North Pole and Beaufort Sea regions to add context to the model biases. As above however, we would argue that this is only tangential to the purpose of the paper, which is to demonstrate the IMB-based evaluation. OHT is more relevant when discussing the causes of the model biases. But it is probably useful context so we will give it.

*b) You compare different years from the model (1980-1999) and observations (1997-2016). I know you did analysis about how the periods are different (Pg.12, lines 13-24) but why not just use the same years that presumably have comparable radiative forcing?*

We chose the period of 1980-1999 for consistency with the earlier study of HadGEM2-ES sea ice and surface radiation. The historical ensembles of HadGEM2-ES actually end in 2005, so it would be necessary to use a scenario experiment to get a comparable time period.

## *2) Additional sources of uncertainty*

*You mention uncertainty in salinity as one of the big uncertainties in the IMB flux calculations. I think you need to mention that there are also large ranges in the observed snow and ice densities (see refs below) that could cause uncertainty in the retrievals. The values you use are reasonable, but you need to at least acknowledge this and do some basic calculations about how big a difference these values make. Franz et al. 2019 (doi: 10.5194/tc-13-775-2019) Webster et al. 2018 (doi: 10.1038/s41558-018-0286-7)*

This is a good idea and we will add a density component to the uncertainties in any subsequent paper revision.

## *3) Significance*

*You spend much of section 3 describing differences in observations in two regions and sections 4.1/4.2 describing differences in the mean state of the model and observations. No significance tests were discussed to indicate whether the means are really significantly different in Figs. 7/8. A simple t-test should suffice, but without this I have a hard time believing some of the conclusions (e.g. that September fluxes differ in the IMB between regions).*

This would also be a valuable addition. A Welch t-test would appear to be appropriate, as in most cases the sample sizes will not be the same and the variances of the distributions cannot be assumed to be equal.

## **Moderate concerns**

### *1) Model thermodynamics*



*I am surprised that HadGEM2-ES, a CMIP class climate model, uses the very simple zero-layer thermodynamics and I think that this should be addressed. The Bitz and Lipscomb thermodynamics is more realistic than zero-layer, and even this has been superseded by the mushy layer thermodynamics of Turner and Hunke (see below). I realize you can't change the model at this point and this shouldn't prevent publication, but your own results show that the assumptions of the zero-layer scheme for conductive fluxes are bad (Fig. 7 and Table 1). Maybe one of the conclusions should be that the zero-layer cannot represent the observed processes so HadGEM2-ES might want to stop using it?*

*Bitz and Lipscomb 1999 (doi: 10.1029/1999JC900100) Turner and Hunke 2015 (doi: 10.1002/2014JC010358)*

The new UK CMIP6 models, HadGEM3-GC3.1 and UKESM1.0, use the multilayer thermodynamics formulation of Bitz and Lipscomb (1999); a further paper is planned to compare these to HadGEM2-ES. But our view is that they are not relevant for the present study, which is intended to demonstrate a new method of evaluation rather than to compare models.

## 2) Figures

*Individually these comments are fairly minor, but the sum of them is moderate.*

- Table 1 –Please add the # values per month and per flux to this table rather than just listing them in the text. Also, adding the units below the flux names (not just in the table description) would be helpful. I expect top melt to usually be in cm/day (or kg m<sup>-2</sup>s<sup>-1</sup>), not W/m<sup>2</sup>.*

Adding number of samples and units are both good suggestions to aid clarity, and will be carried out. However our view is that changing top melt units to cm / day would be unhelpful. This is because cm/day as a unit is less meaningful for the conductive and ocean heat fluxes, as these fluxes are not automatically converted to sea ice melt. And it's obviously desirable that the units should be consistent throughout the table.

*Fig. 1 – It would be helpful to add the sign convention for fluxes here at the interfaces (show the flux direction for positive!). Either label or remove the red/yellow arrows.*

The red and yellow arrows denote radiative fluxes, and will be labelled. We are not sure that a sign convention is necessary for a figure that is purely schematic, as the figure does not attempt to show any numbers. Possibly the sign convention for later figures (particularly 7 and 8) could be more clearly given, however.

*Fig.3 and Fig.4 –you don't have units on the y-axis or in the labels.*

Apologies – these will be added.

*Fig. 4 – Please define surface\_r and interface\_r. Is snow depth the difference between these two lines? Please clarify on the figure and in text.*

Yes, snow depth is the difference between the two lines and this will be stated.

*Fig. 5 –I think a diagram of an IMB would be helpful for modelers, which I think this one is, but it's poorly labeled.What do the dots represent (thermistors?) Is this why they go above the snow interface)? What does the L/R position of the dots mean (temperature?)? Why is there a green line over part of the dots?*

This figure is intended to illustrate the calculation of basal conductive flux and ocean heat flux from IMB data, as in Lei et al (2014), rather than being a more general diagram of an IMB. The green line therefore illustrates a linear fit through temperatures in the layer through which the basal conductive flux is calculated.

*Fig. 6 –the circle colors on this figure are very hard to make distinguish. Perhaps different shaped symbols in black would be better? Again, define surface\_r, interface\_r, and bottom\_r. Are points where there is blue (aka surface\_r) mean that the blue and green circles are overlapping? Adding arrows to indicate the transitions for the false bottom would also be helpful? This figure also makes me question why you don't linearly interpolate between the "correct" depth—it looks possible so why lose that data?*

We will carry out the corrections to the figure the reviewer suggests. Interpolating over the false bottom would probably work in this case. Such a step would need to be carried out at an earlier part of the analysis. However, interpolation might fail in other cases where

- false bottom formation was more gradual in onset
- the false bottom lasted for a longer time, concealing additional ice formation at the true ice base. In this case, analysis of the ice temperature might help, but it remains the case that false bottom formation greatly complicates the analysis.

*Fig. 7 – It might be clearer to show the total spread in values with shading and then just a central dot for the mean since the individual points with their spread get hard to distinguish. Also, in text you list the means but they need to be shown to be significantly different.*

We agree that this might make the figure clearer to read. But we would also then add an additional paragraph to discuss the uncertainty of the individual measurements, as these would not then be shown in any figure.

*Fig. 8 – What purpose does this figure provide other than the model bias, which we already expected from your previous work. Again, if you do show it, significance tests are important. I think a PDF of the flux by thickness would be more helpful to supplement this figure.*

It is true that the figure 'only' shows the model bias – but that is the whole point of a model evaluation, and the purpose of this paper is to demonstrate the value of this method of evaluation. Showing that the method is able to demonstrate model biases despite observational uncertainty, and that these biases are consistent with previous information, is vital to this.

We agree that significance tests would improve the evaluation, and that plotting conductive flux against thickness would be a useful exercise. As discussed above, it is difficult to obtain a true like-for-like comparison of mean thicknesses over ice in model grid cells to the point measurements of ice thickness to the IMBs. In the case of the conductive fluxes, the harmonic mean thickness over categories provides a meaningful comparison, but it is more difficult to see how these problems might be overcome when comparing the top melting and ocean heat fluxes by ice thickness.

### 3) Code availability

*The effort put in here by the authors to make the data available is lackluster. I understand the model code itself may not be available. However, the authors should make more effort to list how to get the buoy data (raw and processed) as well as the model data (if the code isn't available) since these should be public if it's part of the CMIP archive. See the guidance on the website: [https://www.geoscientific-model-development.net/for\\_authors/code\\_and\\_data\\_policy.html](https://www.geoscientific-model-development.net/for_authors/code_and_data_policy.html)*

In fact the code can now be made available pending an internal review process, but this was not known at the time of initial publication.

The reviewer's suggestion that the processed IMB data should be made available was also made by Reviewer 1. As we agree that this would be a very useful step, we are currently overhauling the code in order to produce this data in a standard format (netCDF), and hope to publish this with the next revision of the paper, if one is requested.

### **Minor concerns**

*Shu et al. 2015 isn't in your references.*

This will be added.

*Pg.4, line 6-8 – do you mean the ice temperature or air temperature? What's going on to cause the non-physical temperatures?*

Both can be affected, although the ice temperature is more likely to affect the ensuing analysis, and therefore more likely to be noticed and corrected. We assume that the cause is usually a sensor failure.

*Pg.4 line 14 -How long do buoys last? Give a range here.*

We will provide this.

*On page 7 you state the convention of positive fluxes indicate downwards. It would be very helpful if you mention that much earlier on Page 4 line 21. And put this on a diagram (Fig.1 and/or Fig.5) too.*

We will state this in the places you suggest (for the reasons above we think Figure 5 might be preferable to Figure 1 – this information may not be appropriate for an introductory schematic).

*Pg.7 line 20 –how thin is “quite thin”? Be specific!*

We will state the range of thicknesses for which this problem is relevant (very roughly, below 1.5m).

*Pg.7 line 26-28 –These means are over all available buoys and all years, right? It would be good to be explicit.*

Yes, they are over all buoys and all years.

*Pg.9 line 15 –change “7 to 143” W/m2 because negative fluxes are possible and the current wording is unclear.*

This will be changed.

*Pg.8 line 25 AND Pg.10 line 1, mention that those regions are defined in Fig.2.*

This will be mentioned.

*Pg.12, line 5 –what is the model grid(it hasn't been mentioned)?Why the huge range in grid cell size?*

The model grid is a regular latitude-longitude grid (the 'HadGOM grid'), with width one degree latitude and longitude throughout the world except in the tropics, where the latitudinal resolution is somewhat increased. Hence the range in grid widths in km in the Arctic is quite large, falling from ~40km near 70N to ~2km near the North Pole. The grid height, meanwhile, is one degree throughout (~110km).

### **3. Summary of proposed changes and additions to manuscript arising from reviews**

The most substantial additional piece of work we will carry out is not directly linked to the manuscript. We will continue to overhaul the code in order to produce a processed dataset for publication, and the code will be published also after internal review.

## Major changes to the manuscript

- The analysis will be extended to all four ensemble members of HadGEM2-ES, to allow model biases to be better set in context of internal variability.
- Uncertainty estimates on each monthly flux will be refined to allow for uncertainty in ice and snow density, and in fundamental constants of the relationship between temperature, salinity, conductivity and heat capacity. We will also expand the salinity ranges for both the top and lower surfaces of the ice.
- A discussion of the relationship between conductive flux and ice thickness will be added, probably with the aid of a scatter plot. For the reasons indicated a comparison of the relationships between ice thickness and top melt / ocean heat fluxes may be less useful, and will therefore probably not be included.

## Moderate changes

- Where requested, the method descriptions in section 2 will be clarified, possibly with additional figures to demonstrate the process of top conductive flux estimation, as well as the more general IMB diagram requested by reviewer 2.
- The purpose of the paper will be clarified – the aim is not to investigate the model biases of HadGEM2-ES, but to demonstrate the value of a new method of model evaluation using HadGEM2-ES as a case study.
- The positive=downwards sign convention will be stated earlier and more frequently.
- We will attempt to process erroneous top melting and conductive fluxes prior to monthly averaging.

In addition, all minor changes indicated above will be made as suggested.

## References

Pringle, D. J., Eicken, H., Trodahl, H. J., Backstrom, L. G. E.: Thermal conductivity of landfast Antarctic and Arctic sea ice, J. Geophys. Res. (Oceans), 112, C4, doi: [10.1029/2006JC003641](https://doi.org/10.1029/2006JC003641)
